# Supplementary material
Source: PubMed Central journal article supplement (PMC8675098)
Supplement: NIHMS1762988-supplement-Complete_supplementary_material.pdf [file NIHMS1762988-supplement-Complete_supplementary_material.pdf]

---

# Chromosome-scale inference of hybrid speciation and admixture with convolutional neural networks

SUPPLEMENTAL MATERIALS

Paul D. Blischak, Michael S. Barker, and Ryan N. Gutenkunst

---

## Contents

|                       |   |
|-----------------------|---|
| S1 Summary statistics | 2 |
|-----------------------|---|

## List of Tables

|                                                                                  |   |
|----------------------------------------------------------------------------------|---|
| S1 Breakdown of image processing by HyDe-CNN                                     | 3 |
| S2 Precision and recall of HyDe-CNN for mean $d_{XY}$                            | 3 |
| S3 Precision and recall of HyDe-CNN for minimum+mean $d_{XY}$                    | 4 |
| S4 Precision and recall of the Flagel <i>et al.</i> network for minimum $d_{XY}$ | 4 |
| S5 Precision and recall of the Flagel <i>et al.</i> network for mean $d_{XY}$    | 4 |
| S6 Precision and recall for the random forest classifier                         | 5 |

## List of Figures

|                                                                            |    |
|----------------------------------------------------------------------------|----|
| S1 Confusion matrices for HyDe-CNN (mean $d_{XY}$ )                        | 6  |
| S2 Confusion matrices for HyDe-CNN (minimum+mean $d_{XY}$ )                | 7  |
| S3 Confusion matrices for Flagel <i>et al.</i> network (minimum $d_{XY}$ ) | 8  |
| S4 Confusion matrices for Flagel <i>et al.</i> network (mean $d_{XY}$ )    | 9  |
| S5 Model predictions for no hybridization test simulations                 | 10 |
| S6 Model predictions for hybrid speciation test simulations                | 11 |
| S7 Model predictions for admixture with migration test simulations         | 12 |
| S8 Admixture statistics calculated for 0.5 CU branch scaling               | 13 |
| S9 Admixture statistics calculated for 1.0 CU branch scaling               | 14 |
| S10 Admixture statistics calculated for 2.0 CU branch scaling              | 15 |
| S11 Confusion matrices for <i>Heliconius</i> simulations                   | 16 |

# Supplemental Text

## S1 Summary statistics

To train a random forest classifier for model selection we calculated the statistics  $D$  (Green *et al.* 2010),  $f_{hom}$  (Durand *et al.* 2011), and  $D_p$  (Hamlin *et al.* 2020) on the phylogeny  $((P_1, P_2), P_3), O$ . The allele-frequency based formulas for each statistic are given below, where  $\hat{p}_{i,\ell}$  is the derived allele frequency for population  $i$  at locus  $\ell$ .

$$D = \frac{\sum_L(1 - \hat{p}_{1,\ell})\hat{p}_{2,\ell}\hat{p}_{3,\ell}(1 - \hat{p}_{O,\ell}) - \hat{p}_{1,\ell}(1 - \hat{p}_{2,\ell})\hat{p}_{3,\ell}(1 - \hat{p}_{O,\ell})}{\sum_L(1 - \hat{p}_{1,\ell})\hat{p}_{2,\ell}\hat{p}_{3,\ell}(1 - \hat{p}_{O,\ell}) + \hat{p}_{1,\ell}(1 - \hat{p}_{2,\ell})\hat{p}_{3,\ell}(1 - \hat{p}_{O,\ell})}$$

$$f_{hom} = \frac{\sum_L(1 - \hat{p}_{1,\ell})\hat{p}_{2,\ell}\hat{p}_{3,\ell}(1 - \hat{p}_{O,\ell}) - \hat{p}_{1,\ell}(1 - \hat{p}_{2,\ell})\hat{p}_{3,\ell}(1 - \hat{p}_{O,\ell})}{\sum_L(1 - \hat{p}_{1,\ell})\hat{p}_{3,\ell}\hat{p}_{3,\ell}(1 - \hat{p}_{O,\ell}) - \hat{p}_{1,\ell}(1 - \hat{p}_{3,\ell})\hat{p}_{3,\ell}(1 - \hat{p}_{O,\ell})}$$

$$D_p = \frac{\sum_L(1 - \hat{p}_{1,\ell})\hat{p}_{2,\ell}\hat{p}_{3,\ell}(1 - \hat{p}_{O,\ell}) - \hat{p}_{1,\ell}(1 - \hat{p}_{2,\ell})\hat{p}_{3,\ell}(1 - \hat{p}_{O,\ell})}{\sum_L(1 - \hat{p}_{1,\ell})\hat{p}_{2,\ell}\hat{p}_{3,\ell}(1 - \hat{p}_{O,\ell}) + \hat{p}_{1,\ell}(1 - \hat{p}_{2,\ell})\hat{p}_{3,\ell}(1 - \hat{p}_{O,\ell}) + \hat{p}_{1,\ell}\hat{p}_{2,\ell}(1 - \hat{p}_{3,\ell})(1 - \hat{p}_{O,\ell})}$$

## Supplemental References

Durand, E. Y., Patterson, N., Reich, D., and Slatkin, M. 2011. Testing for ancient admixture between closely related populations. *Molecular Biology and Evolution*, 28: 2239–2252.

Green, R. E., Krause, J., Briggs, A. W., Maricic, T., Stenzel, U., Kircher, M., Patterson, N., Li, H., Zhai, W., Fritz, M. H.-Y., Hansen, N. F., Durand, E. Y., Malaspina, A.-S., Jensen, J. D., Marques-Bonet, T., Alkan, C., Prüfer, K., Meyer, M., Burbano, H. A., Good, J. M., Schultz, R., Aximu-Petri, A., Butthof, A., Höber, B., Höffner, B., Siegemund, M., Weihmann, A., Nusbaum, C., Lander, E. S., Russ, C., Novod, N., Affourtit, J., Egholm, M., Verna, C., Rudan, P., Brajkovic, D., Kucan, Ž., Gušić, I., Doronichev, V. B., Golovanova, L. V., Lalueza-Fox, C., de la Rasilla, M., Fortea, J., Rosas, A., Schmitz, R. W., Johnson, P. L. F., Eichler, E. E., Falush, D., Birney, E., Mullikin, J. C., Slatkin, M., Nielsen, R., Kelso, J., Lachmann, M., Reich, D., and Pääbo, S. 2010. A draft sequence of the Neandertal genome. *Science*, 328: 710–722.

Hamlin, J. A. P., Hibbins, M. S., and Moyle, L. C. 2020. Assessing biological factors affecting postspeciation introgression. *Evolution Letters*, 4: 137–154.

# Supplemental Tables

Table S1: Breakdown of how images are processed through the HyDe-CNN architecture. The original input shape is (1000, 6, 1) for the minimum and mean  $d_{XY}$  networks and is (1000, 6, 2) for the minimum+mean  $d_{XY}$ .

| Layer                | Output shape | Number of parameters |
|----------------------|--------------|----------------------|
| 2D Convolution 1     | (997, 5, 12) | 108                  |
| 2D Average Pooling 1 | (498, 5, 12) | -                    |
| Dropout 1            | (498, 5, 12) | -                    |
| 2D Convolution 2     | (495, 4, 24) | 2328                 |
| 2D Average Pooling 2 | (247, 4, 24) | -                    |
| Dropout 2            | (247, 4, 24) | -                    |
| 2D Convolution 3     | (244, 3, 36) | 6948                 |
| 2D Average Pooling 3 | (122, 3, 36) | -                    |
| Dropout 3            | (122, 3, 36) | -                    |
| 2D Convolution 4     | (119, 2, 48) | 13872                |
| 2D Average Pooling 4 | (59, 2, 48)  | -                    |
| Dropout 4            | (59, 2, 48)  | -                    |
| Flatten              | (5664)       | -                    |
| Dense 1              | (60)         | 339900               |
| Dropout 5            | (60)         | -                    |
| Dense 2              | (4)          | 244                  |

Table S2: Precision and recall of HyDe-CNN trained on images of mean  $d_{XY}$  for model selection on independent test data. Branch scaling is given in coalescent units (CU).

| Branch Scaling | Model     | Precision | Recall |
|----------------|-----------|-----------|--------|
| 0.5            | no_hyb    | 0.725     | 0.850  |
|                | hyb_sp    | 0.796     | 0.896  |
|                | admix     | 0.572     | 0.365  |
|                | admix_mig | 0.708     | 0.753  |
| 1.0            | no_hyb    | 0.827     | 0.960  |
|                | hyb_sp    | 0.902     | 0.908  |
|                | admix     | 0.804     | 0.700  |
|                | admix_mig | 0.923     | 0.889  |
| 2.0            | no_hyb    | 0.908     | 0.989  |
|                | hyb_sp    | 0.945     | 0.914  |
|                | admix     | 0.901     | 0.803  |
|                | admix_mig | 0.943     | 0.992  |

Table S3: Precision and recall of HyDe-CNN trained on images of minimum+mean  $d_{XY}$  for model selection on independent test data. Branch scaling is given in coalescent units (CU).

| Branch Scaling | Model     | Precision | Recall |
|----------------|-----------|-----------|--------|
| 0.5            | no_hyb    | 0.837     | 0.930  |
|                | hyb_sp    | 0.926     | 0.841  |
|                | admix     | 0.798     | 0.674  |
|                | admix_mig | 0.822     | 0.932  |
| 1.0            | no_hyb    | 0.911     | 0.972  |
|                | hyb_sp    | 0.843     | 0.982  |
|                | admix     | 0.971     | 0.691  |
|                | admix_mig | 0.944     | 0.996  |
| 2.0            | no_hyb    | 0.916     | 0.985  |
|                | hyb_sp    | 0.930     | 0.949  |
|                | admix     | 0.943     | 0.826  |
|                | admix_mig | 0.972     | 1.000  |

Table S4: Precision and recall of the Fligel *et al.* network trained on images of minimum  $d_{XY}$  for model selection on independent test data. Branch scaling is given in coalescent units (CU).

| Branch Scaling | Model     | Precision | Recall |
|----------------|-----------|-----------|--------|
| 0.5            | no_hyb    | 0.810     | 0.808  |
|                | hyb_sp    | 0.859     | 0.845  |
|                | admix     | 0.703     | 0.457  |
|                | admix_mig | 0.699     | 0.956  |
| 1.0            | no_hyb    | 0.855     | 0.975  |
|                | hyb_sp    | 0.922     | 0.858  |
|                | admix     | 0.789     | 0.770  |
|                | admix_mig | 0.979     | 0.932  |
| 2.0            | no_hyb    | 0.899     | 0.936  |
|                | hyb_sp    | 0.956     | 0.817  |
|                | admix     | 0.776     | 0.856  |
|                | admix_mig | 0.996     | 0.997  |

Table S5: Precision and recall of the Fligel *et al.* network trained on images of mean  $d_{XY}$  for model selection on independent test data. Branch scaling is given in coalescent units (CU).

| Branch Scaling | Model     | Precision | Recall |
|----------------|-----------|-----------|--------|
| 0.5            | no_hyb    | 0.398     | 0.668  |
|                | hyb_sp    | 0.907     | 0.738  |
|                | admix     | 0.494     | 0.474  |
|                | admix_mig | 0.483     | 0.263  |
| 1.0            | no_hyb    | 0.671     | 0.846  |
|                | hyb_sp    | 0.948     | 0.792  |
|                | admix     | 0.664     | 0.496  |
|                | admix_mig | 0.833     | 0.964  |
| 2.0            | no_hyb    | 0.853     | 0.941  |
|                | hyb_sp    | 0.905     | 0.894  |
|                | admix     | 0.837     | 0.701  |
|                | admix_mig | 0.905     | 0.970  |



Table S6: Precision and recall of the random forest classifier trained with introgression summary statistics for model selection on independent test data. Branch scaling is given in coalescent units (CU).

| <b>Branch Scaling</b> | <b>Model</b> | <b>Precision</b> | <b>Recall</b> |
|-----------------------|--------------|------------------|---------------|
| 0.5                   | no_hyb       | 0.651            | 0.765         |
|                       | hyb_sp       | 0.812            | 0.813         |
|                       | admix        | 0.471            | 0.381         |
|                       | admix_mig    | 0.541            | 0.549         |
| 1.0                   | no_hyb       | 0.784            | 0.867         |
|                       | hyb_sp       | 0.838            | 0.836         |
|                       | admix        | 0.665            | 0.560         |
|                       | admix_mig    | 0.744            | 0.784         |
| 2.0                   | no_hyb       | 0.877            | 0.944         |
|                       | hyb_sp       | 0.849            | 0.852         |
|                       | admix        | 0.804            | 0.755         |
|                       | admix_mig    | 0.936            | 0.917         |

# Supplemental Figures

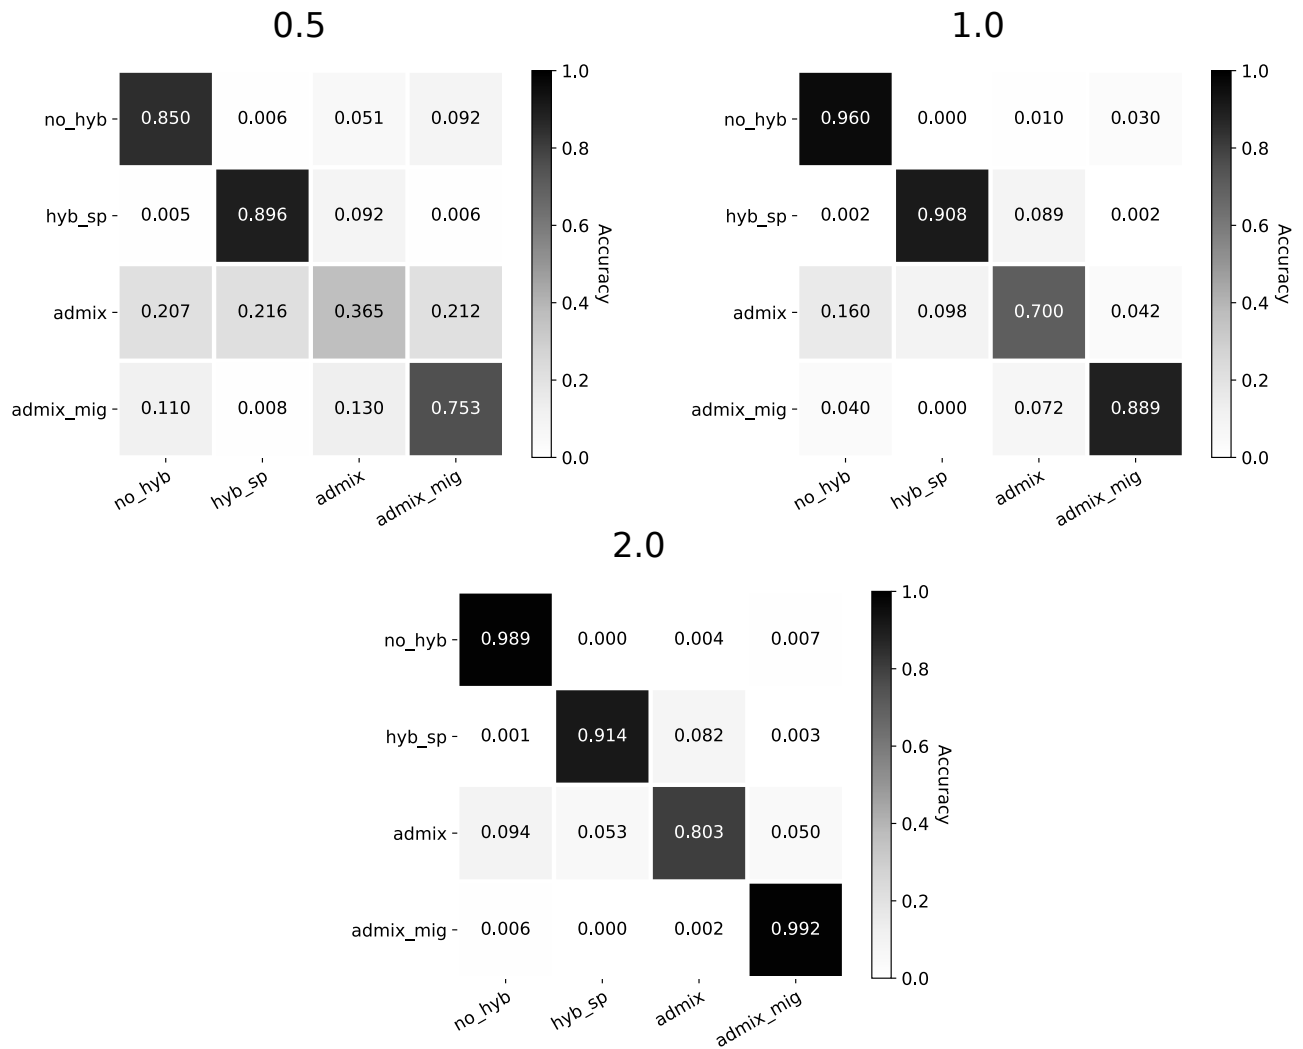

Figure S1: Confusion matrices for the HyDe-CNN architecture trained on images of mean  $d_{XY}$  across different branch scaling factors (specified in coalescent units).

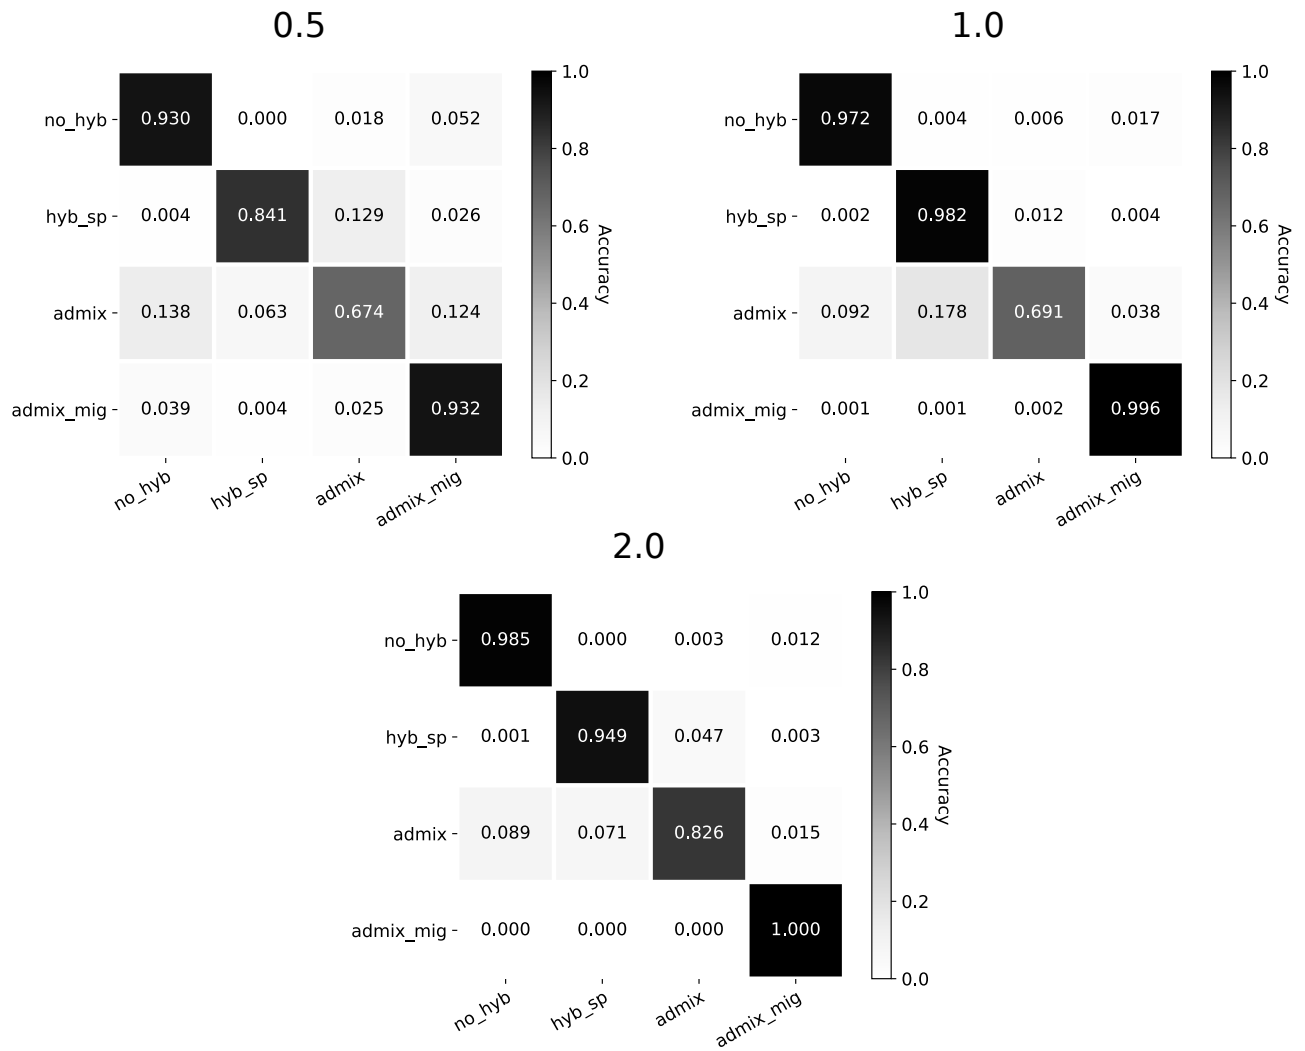

Figure S2: Confusion matrices for the HyDe-CNN architecture trained on images of minimum+mean  $d_{XY}$  across different branch scaling factors (specified in coalescent units).

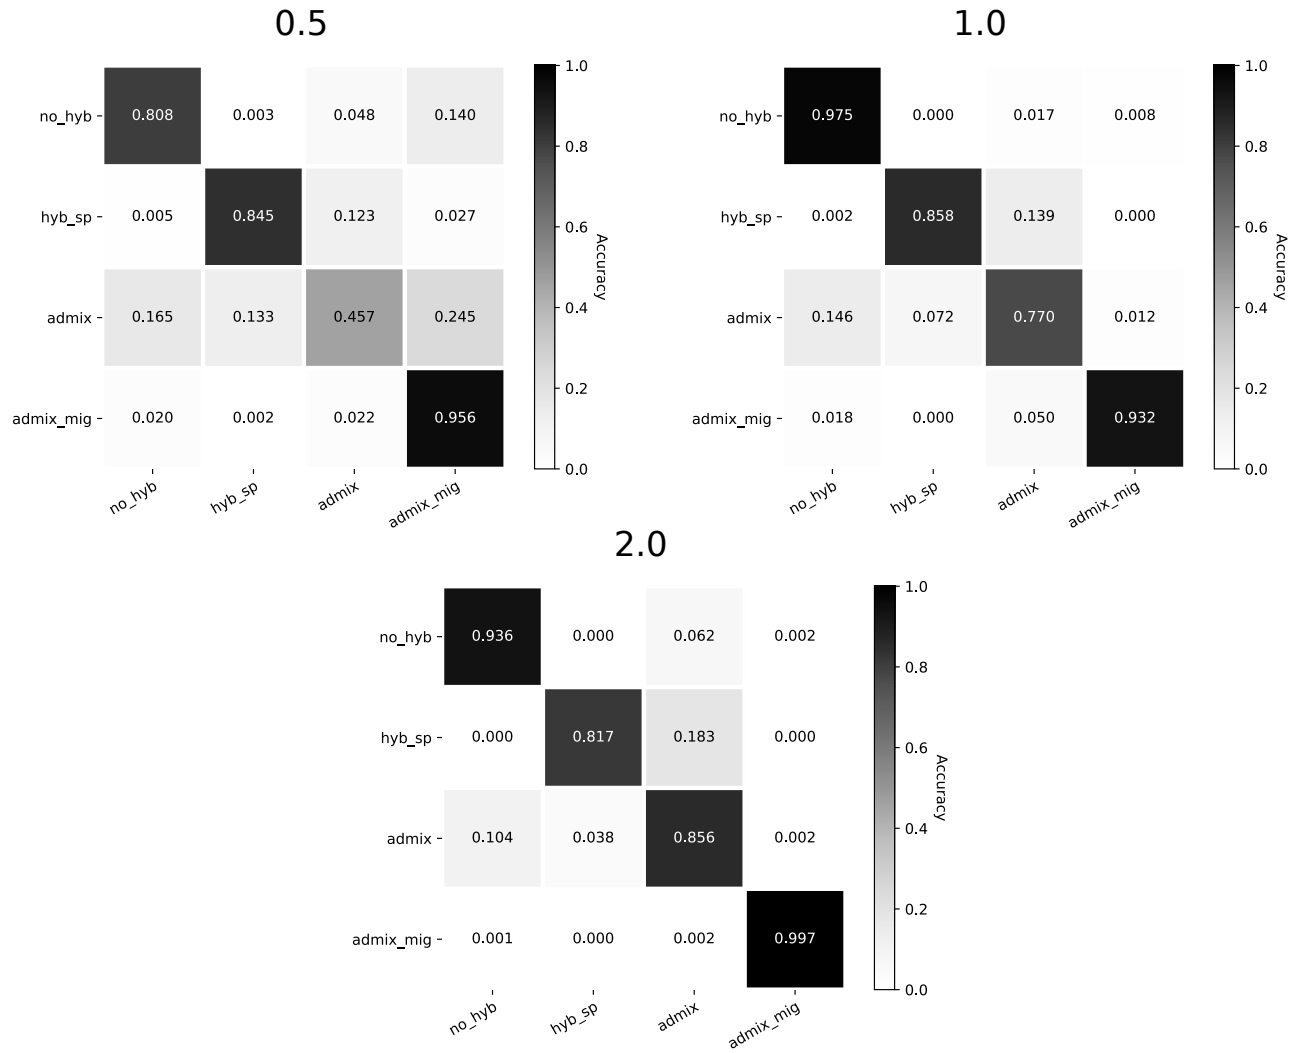

Figure S3: Confusion matrices for the Flagel *et al.* network trained on images of minimum  $d_{XY}$  across different branch scaling factors (specified in coalescent units).

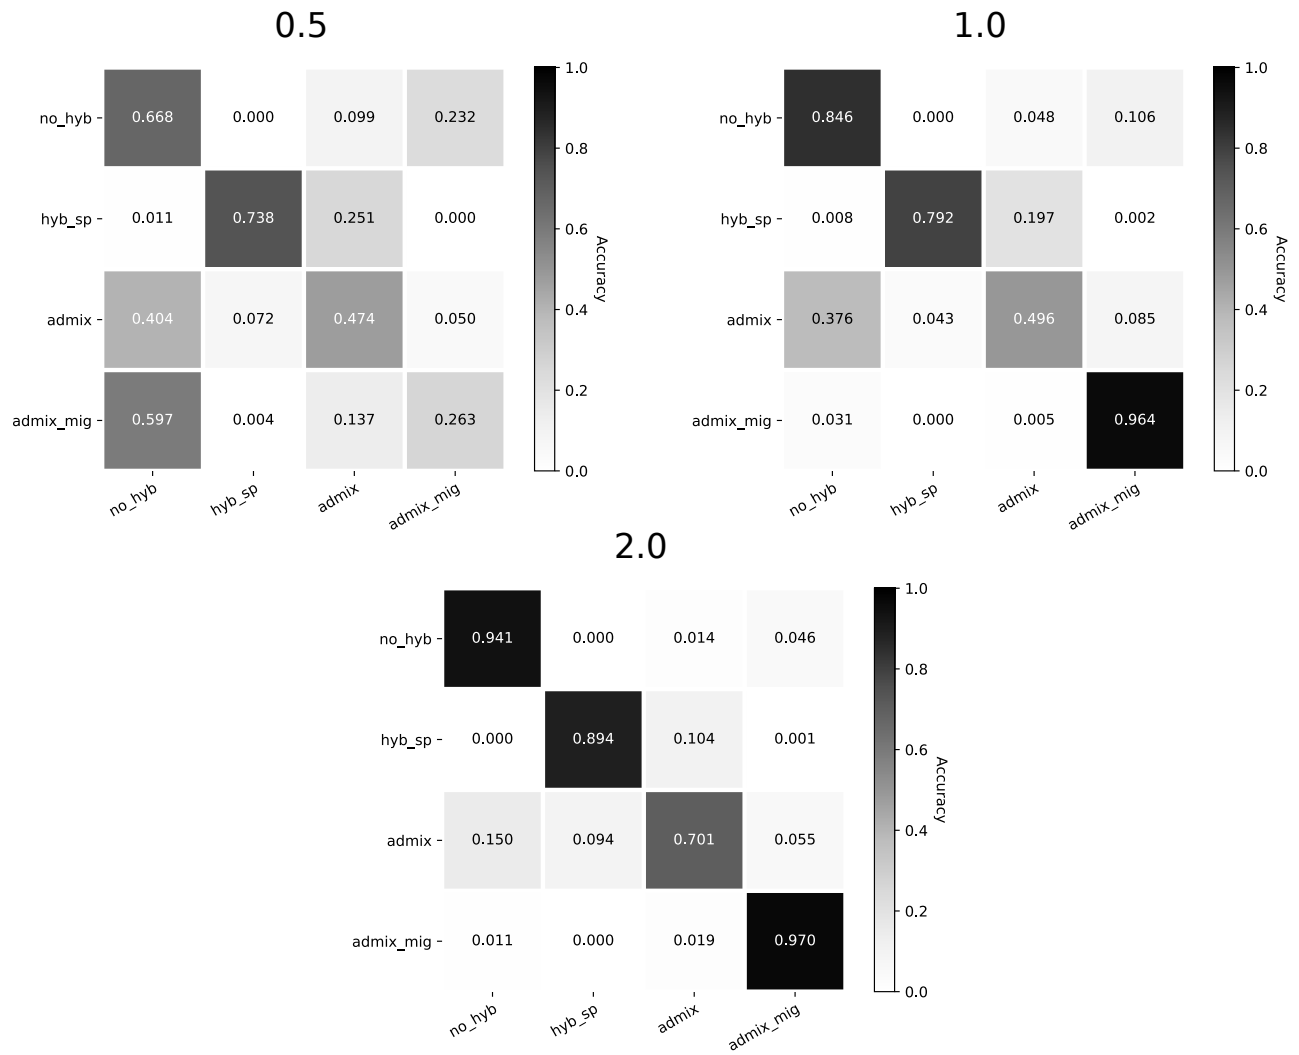

Figure S4: Confusion matrices for the Flagel *et al.* network trained on images of mean  $d_{XY}$  across different branch scaling factors (specified in coalescent units).

### Model Selection for No Hybridization Simulations

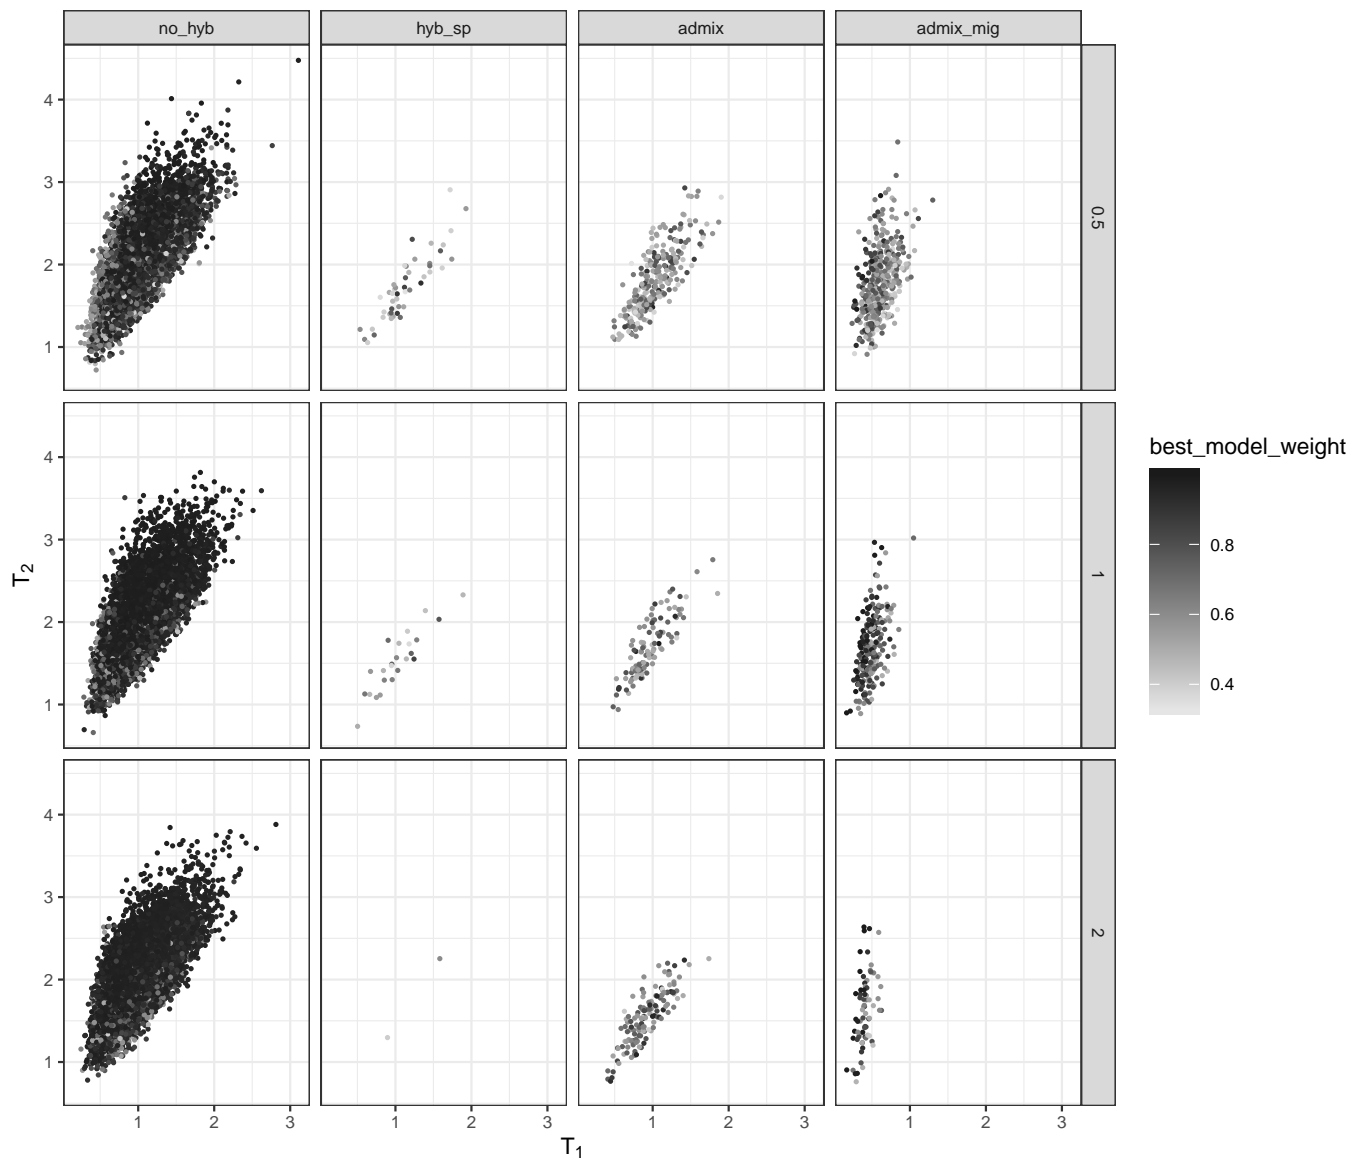

Figure S5: Model prediction for test data simulated under the no hybridization scenario. Columns represent the model chosen by the HyDe-CNN architecture trained on minimum  $d_{XY}$  and rows show different branch scalings. The divergence time between  $P_1$  and  $P_2$  ( $T_1$ ) is plotted on the x-axis and the divergence time between  $P_3$  and  $(P_1, P_2)$  ( $T_2$ ) is plotted on the y-axis.

### Model Selection for Hybrid Speciation Simulations

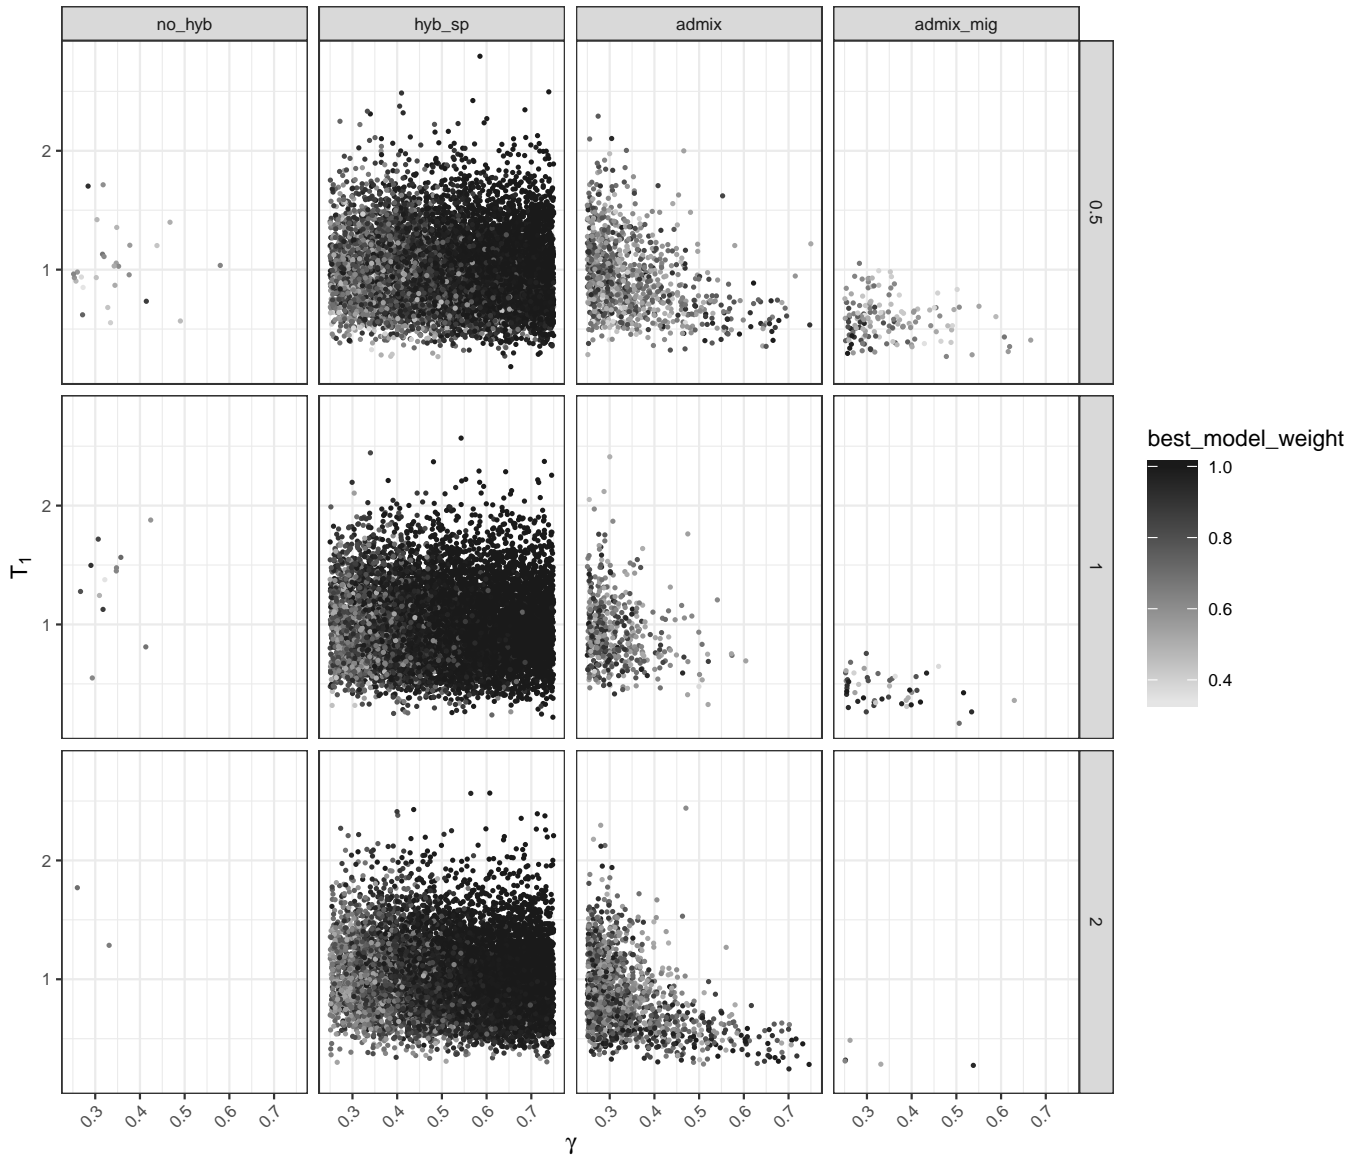

Figure S6: Model prediction for test data simulated under the hybrid speciation scenario. Columns represent the model chosen by the HyDe-CNN architecture trained on minimum  $d_{XY}$  and rows show different branch scalings. The hybridization fraction ( $\gamma$ ) is plotted on the x-axis and the divergence time between  $P_1$  and  $P_2$  ( $T_1$ ) is plotted on the y-axis.

### Model Selection for Admixture with Migration Simulations

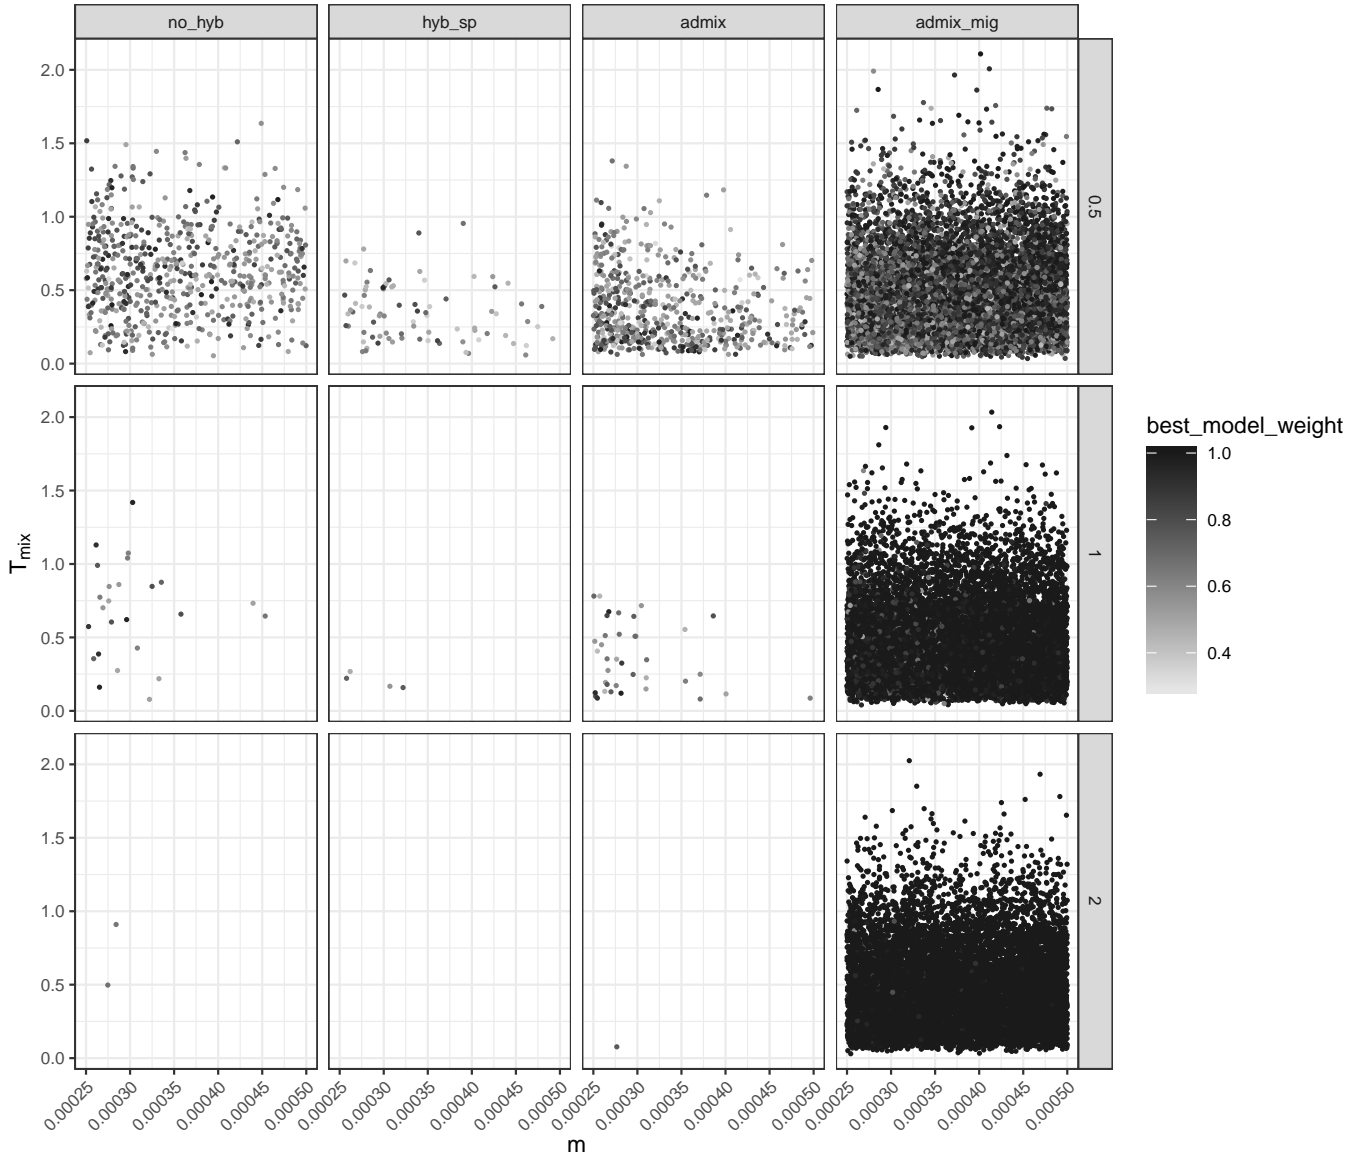

Figure S7: Model prediction for test data simulated under the admixture with gene flow scenario. Columns represent the model chosen by the HyDe-CNN architecture trained on minimum  $d_{XY}$  and rows show different branch scalings. The migration rate  $m$  is plotted on the x-axis and the timing of admixture ( $T_{mix}$ ) is plotted on the y-axis.



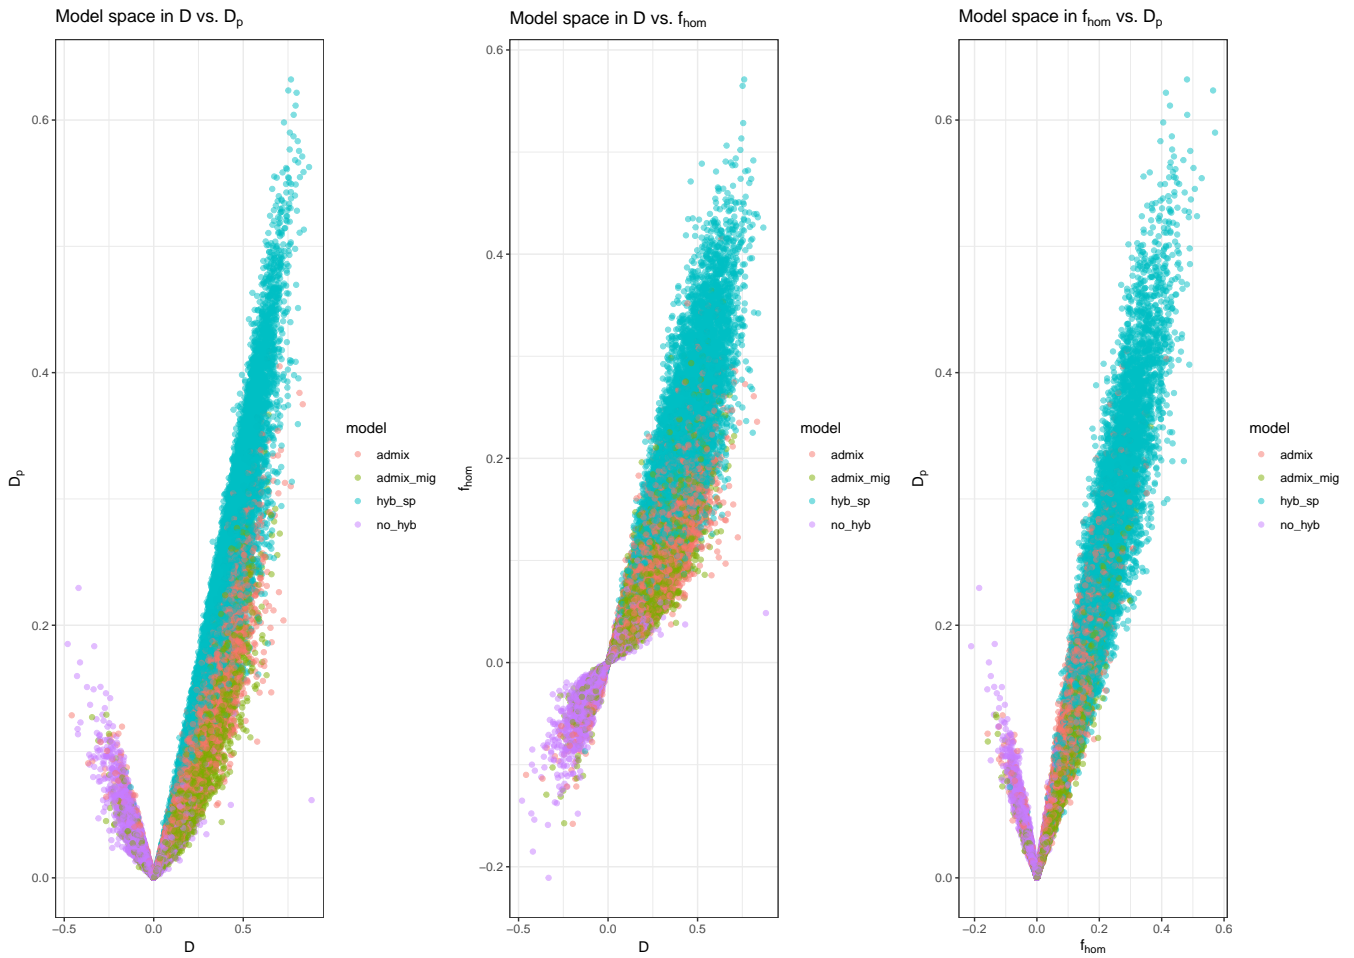

Figure S8: Pairwise plots of calculated summary statistics ( $D$ ,  $f_{hom}$ ,  $D_p$ ) for training a random forest classifier at the 0.5 coalescent unit branch scaling. The color of each dot corresponds with a single simulation and represents its generating model.

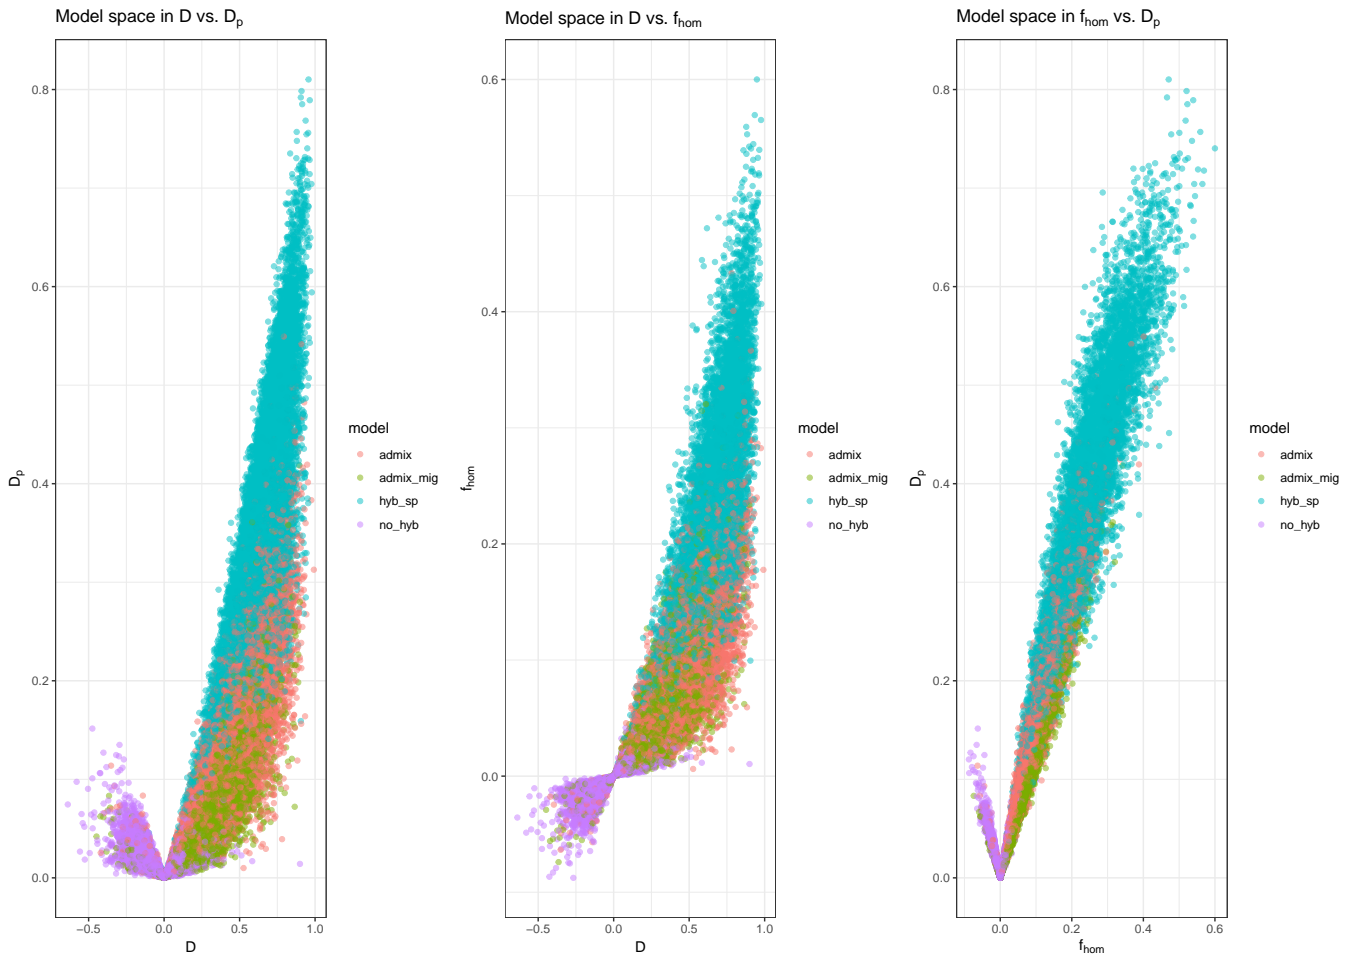

Figure S9: Pairwise plots of calculated summary statistics ( $D$ ,  $f_{hom}$ ,  $D_p$ ) for training a random forest classifier at the 1.0 coalescent unit branch scaling. The color of each dot corresponds with a single simulation and represents its generating model.

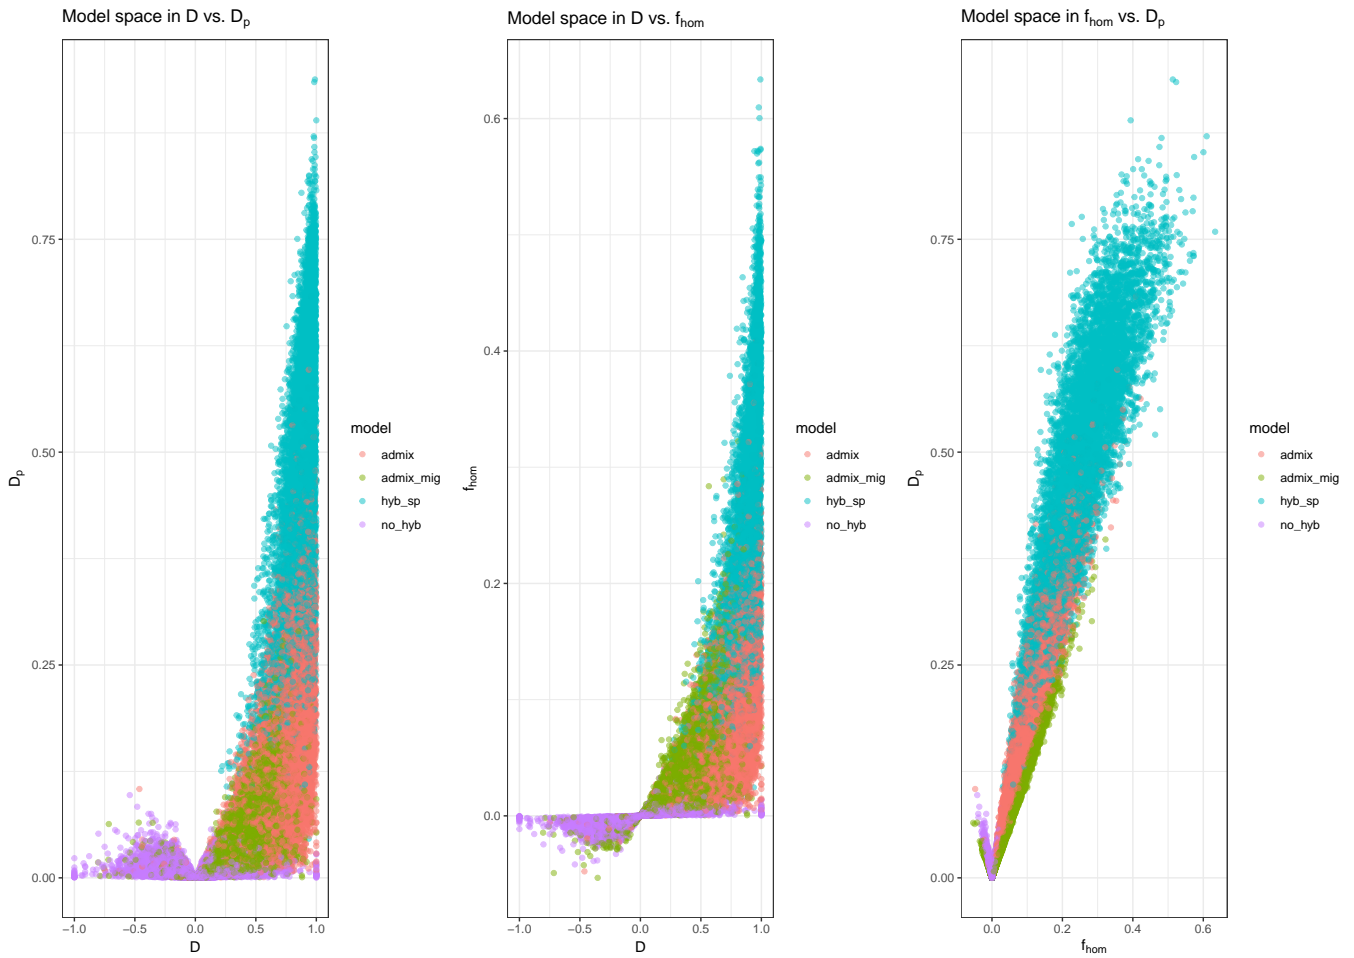

Figure S10: Pairwise plots of calculated summary statistics ( $D$ ,  $f_{hom}$ ,  $D_p$ ) for training a random forest classifier at the 2.0 coalescent unit branch scaling. The color of each dot corresponds with a single simulation and represents its generating model.

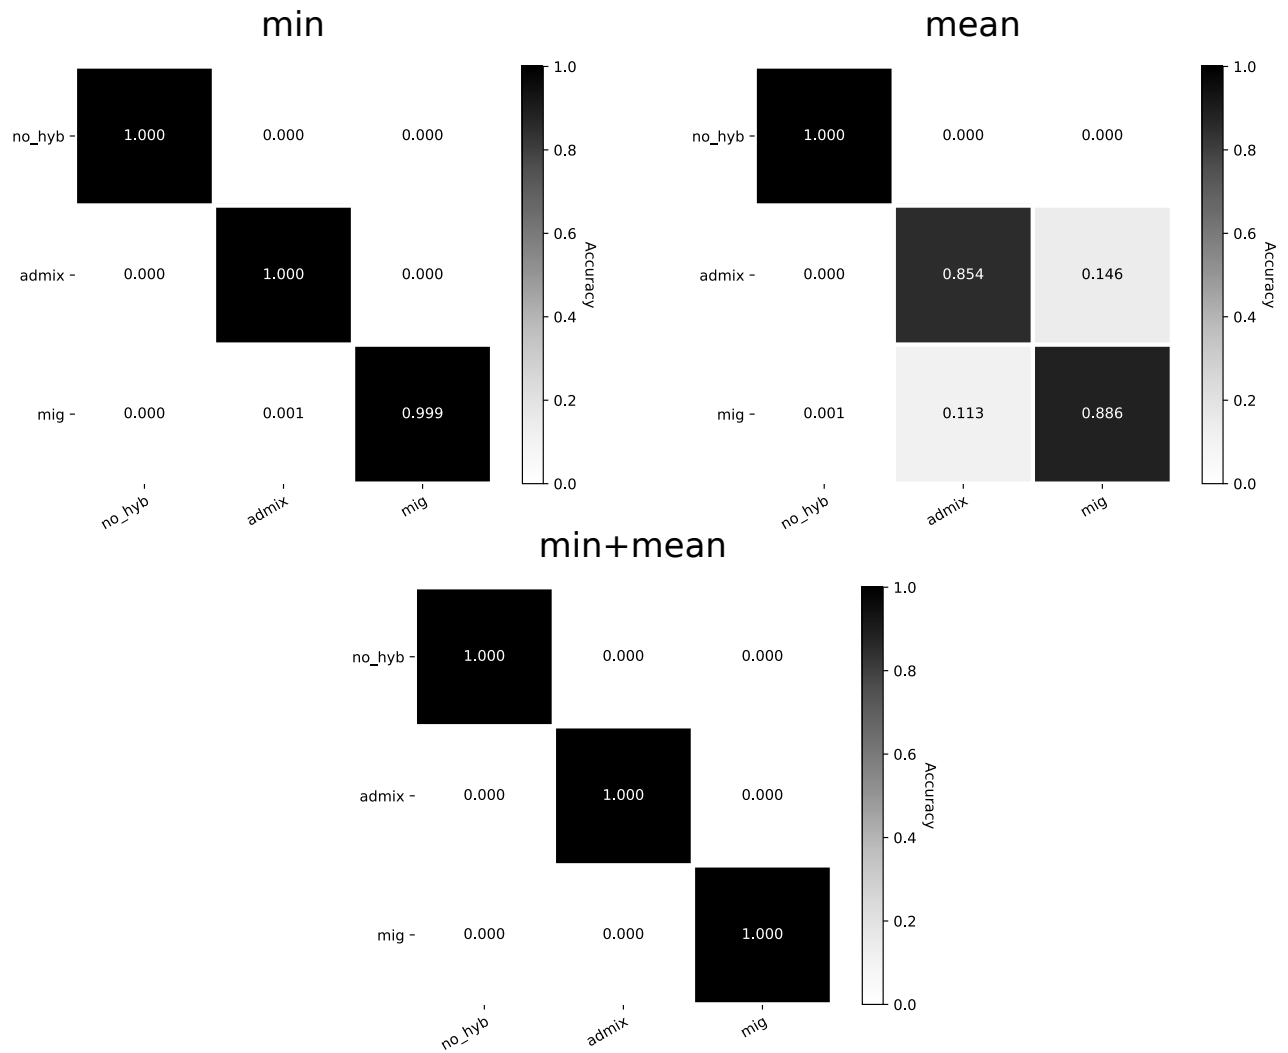

Figure S11: Confusion matrices for images simulated under the demographic models (no hybridization [no\_hyb], admixture [admix], and continuous migration [mig]) tested in *Heliconius* across the different input types.
